# Supplementary material
Source: Springer Nature journal article supplement (https://www.springermedizin.de/resource/supplementary/12879_2012_2376_MOESM2_ESM.pdf/9444476)

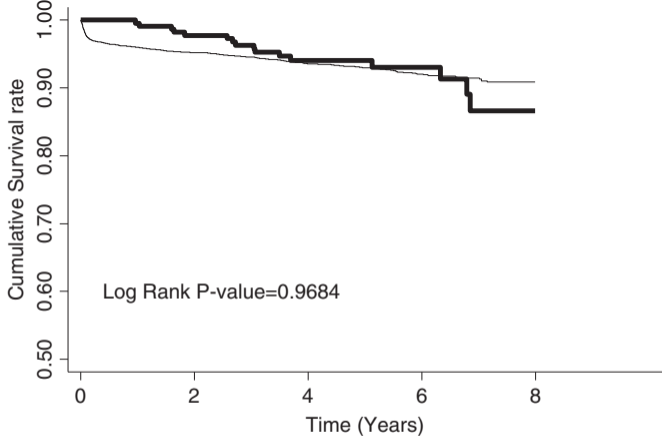

Number at risk

|                 |      |      |      |      |   |
|-----------------|------|------|------|------|---|
| HIV without DNI | 9666 | 9199 | 3656 | 1394 | 0 |
| HIV with DNI    | 222  | 217  | 131  | 63   | 0 |

— HIV without DNI    — HIV with DNI

Supplement: MOESM2 [file 9444476]
